# Supplementary material for: Effects of Antifreeze Protein III on Sperm Cryopreservation of Pacific Abalone, Haliotis discus hannai
Source: MDPI journal article supplement (doi:10.3390/ijms22083917), 2021-04-10
Supplement: s1 [file s1]

## Supplementary File

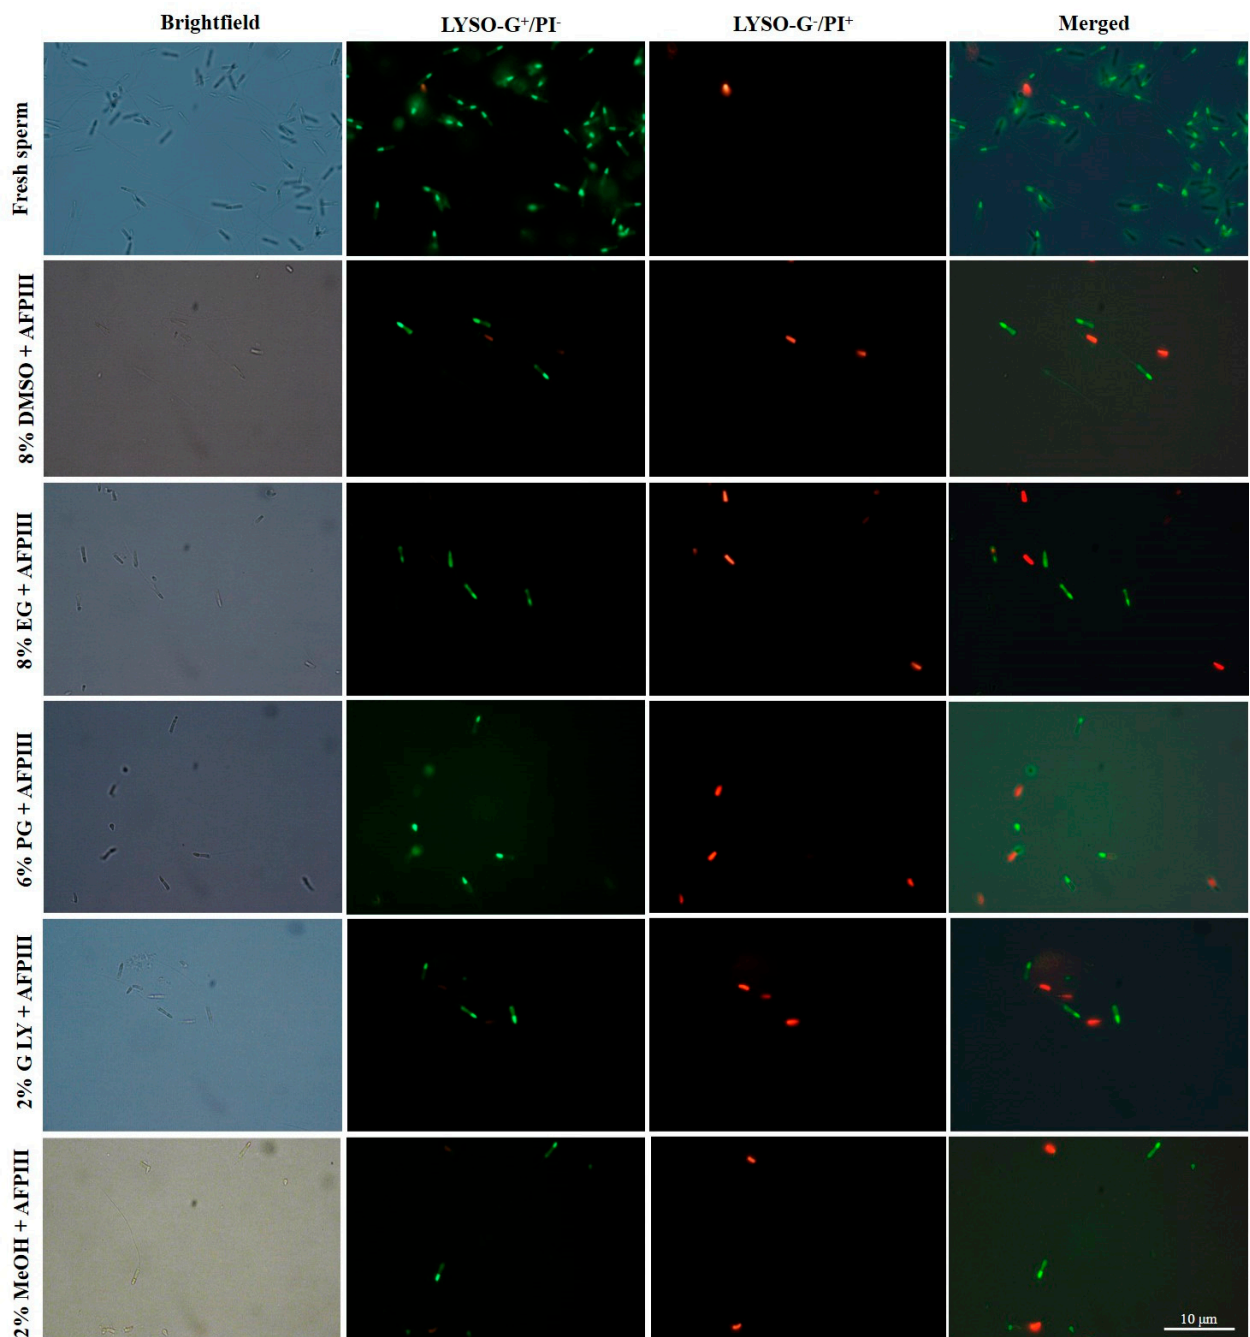

**Figure S1.** Fluorescent stained photographs for detecting acrosome integrity of sperm cryopreserved with AFP111 (1000x magnification).

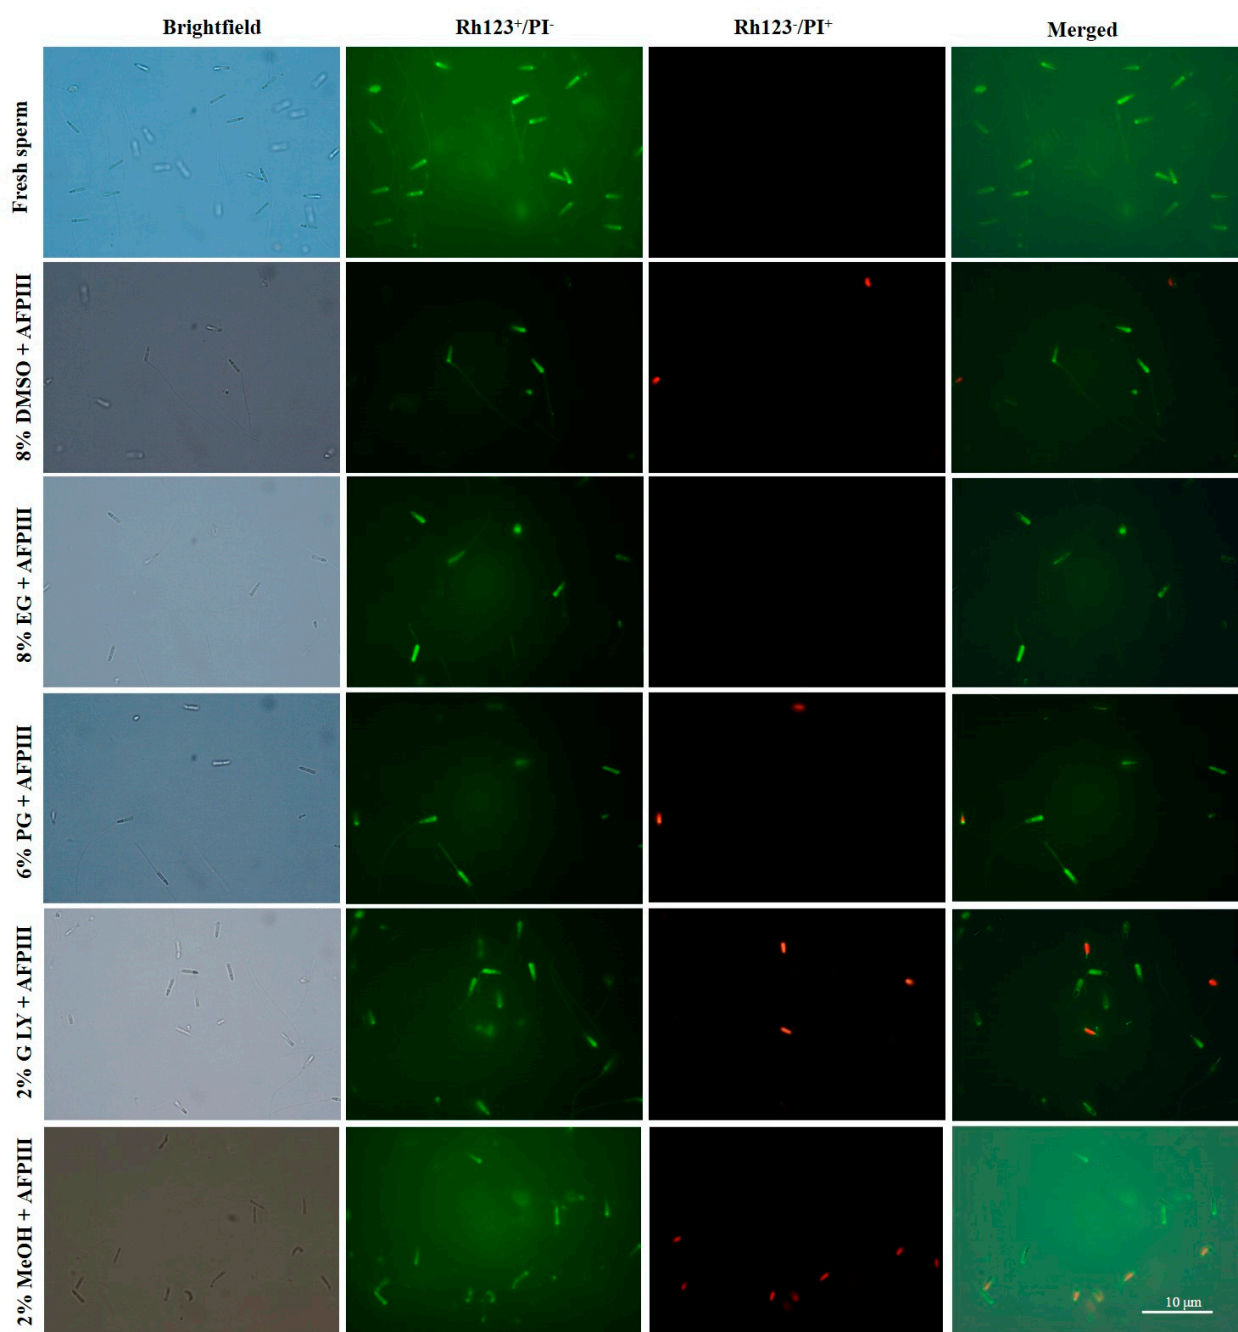

**Figure S2.** Fluorescent stained photographs for detecting mitochondrial membrane potential of sperm cryopreserved with AFPIII (1000x magnification).
